# Supplementary material for: Effect of Nintedanib in Patients with Progressive Pulmonary Fibrosis in Subgroups with Differing Baseline Characteristics
Source: PubMed Central journal article supplement — Adv Ther. 2023 Sep 26;40(12):5536–46. doi: 10.1007/s12325-023-02668-x (PMC10611817; doi:10.1007/s12325-023-02668-x), 2023-09-26
Supplement: 12325_2023_2668_MOESM1_ESM.pdf [file 12325_2023_2668_MOESM1_ESM.pdf]

## **Effect of nintedanib in patients with progressive pulmonary fibrosis in subgroups with differing baseline characteristics**

Martin Kolb,<sup>1</sup> Kevin R Flaherty,<sup>2</sup> Rafael S Silva,<sup>3</sup> Antje Prasse,<sup>4</sup> Carlo Vancheri,<sup>5</sup> Heiko Mueller,<sup>6</sup> Kamila Sroka-Saidi,<sup>6</sup> Athol U Wells<sup>7</sup> on behalf of the INBUILD trial investigators

<sup>1</sup>Department of Medicine, McMaster University and St. Joseph's Healthcare, Hamilton, Ontario, Canada; <sup>2</sup>Division of Pulmonary and Critical Care Medicine, University of Michigan, Ann Arbor, Michigan, USA; <sup>3</sup>Unidad de Respiratorio, Hospital Regional de Talca, Talca, Chile; <sup>4</sup>MHH Hannover Medical School, Department of Respiratory Medicine, Hannover, Germany; <sup>5</sup>Department of Clinical and Experimental Medicine, University of Catania, Catania, Italy; <sup>6</sup>Boehringer Ingelheim International GmbH, Ingelheim am Rhein, Germany; <sup>7</sup>National Institute for Health Research Respiratory Biomedical Research Unit, Royal Brompton and Harefield NHS Foundation Trust, and National Heart and Lung Institute, Imperial College, London, UK.

**Corresponding author:** Martin Kolb, Department of Medicine, Firestone Institute for Respiratory Health and St Joseph's Healthcare Hamilton, T2117 50 Charlton Ave. E., Hamilton, ON L8N 4A6, Canada. Email: kolbm@mcmaster.ca

## Supplementary Material

**Table S1.** Baseline characteristics of subgroups by sex in the INBUILD trial.

|                        | <b>Male (n=356)</b> | <b>Female (n=307)</b> |
|------------------------|---------------------|-----------------------|
| Age, years             | 66.7 (9.6)          | 64.7 (9.9)            |
| BMI, kg/m <sup>2</sup> | 28.0 (4.5)          | 28.9 (6.0)            |
| FVC % predicted        | 69.4 (16.4)         | 68.5 (14.7)           |
| DLco % predicted       | 44.8 (12.7)         | 47.6 (14.5)           |

Data are mean (SD). *BMI*, body mass index, *DLco* diffusing capacity of the lung for carbon monoxide, *FVC* forced vital capacity.

**Table S2.** Baseline characteristics of subgroups by age in the INBUILD trial.

|                        | <b>Age &lt;65 years (n=260)</b> | <b>Age ≥65 years (n=403)</b> |
|------------------------|---------------------------------|------------------------------|
| Age, years             | 56.2 (7.1)                      | 71.9 (5.3)                   |
| Male                   | 123 (47.3)                      | 233 (57.8)                   |
| BMI, kg/m <sup>2</sup> | 28.6 (5.7)                      | 28.0 (5.0)                   |
| FVC % predicted        | 66.5 (14.5)                     | 70.6 (16.1)                  |
| DLco % predicted       | 46.8 (13.5)                     | 45.7 (13.7)                  |

Data are mean (SD) or n (%) of patients. *BMI*, body mass index, *DLco* diffusing capacity of the lung for carbon monoxide, *FVC* forced vital capacity.

**Table S3.** Baseline characteristics of subgroups by race in the INBUILD trial.

|                        | <b>White (n=488)</b> | <b>Asian (n=164)</b> | <b>Black (n=10)</b> |
|------------------------|----------------------|----------------------|---------------------|
| Age, years             | 65.9 (9.5)           | 65.6 (10.4)          | 61.6 (9.4)          |
| Male                   | 266 (54.5)           | 87 (53.0)            | 2 (20.0)            |
| BMI, kg/m <sup>2</sup> | 29.4 (5.1)           | 24.5 (3.6)           | 31.1 (7.4)          |
| FVC % predicted        | 68.7 (15.7)          | 69.4 (15.3)          | 77.5 (17.7)         |
| DLco % predicted       | 46.8 (14.6)          | 44.2 (10.4)          | 46.6 (11.2)         |

Data are mean (SD) or n (%) of patients. *BMI*, body mass index, *DLco* diffusing capacity of the lung for carbon monoxide, *FVC* forced vital capacity.

**Table S4.** Baseline characteristics of subgroups by BMI in the INBUILD trial.

|                        | <b>BMI &lt;25 kg/m<sup>2</sup></b> | <b>BMI ≥25 to &lt;30 kg/m<sup>2</sup></b> | <b>BMI ≥30 kg/m<sup>2</sup></b> |
|------------------------|------------------------------------|-------------------------------------------|---------------------------------|
|                        | <b>(n=188)</b>                     | <b>(n=242)</b>                            | <b>(n=232)</b>                  |
| Age, years             | 65.7 (10.7)                        | 66.6 (9.8)                                | 64.9 (8.9)                      |
| Male                   | 93 (49.5)                          | 148 (61.2)                                | 114 (49.1)                      |
| BMI, kg/m <sup>2</sup> | 22.5 (1.9)                         | 27.4 (1.5)                                | 33.9 (3.9)                      |
| FVC % predicted        | 69.8 (16.9)                        | 69.2 (15.2)                               | 68.1 (15.0)                     |
| DLco % predicted       | 44.0 (12.8)                        | 45.9 (12.3)                               | 48.1 (15.3)                     |

Data are mean (SD) or n (%) of patients. *BMI*, body mass index, *DLco* diffusing capacity of the lung for carbon monoxide, *FVC* forced vital capacity.

**Table S5.** Baseline characteristics of subgroups by time since diagnosis of ILD in the INBUILD trial.

|                        | <b>≤1 year<br/>(n=134)</b> | <b>&gt;1 to ≤3 years<br/>(n=227)</b> | <b>&gt;3 to ≤5 years<br/>(n=131)</b> | <b>&gt;5 years<br/>(n=170)</b> |
|------------------------|----------------------------|--------------------------------------|--------------------------------------|--------------------------------|
| Age, years             | 65.6 (9.7)                 | 66.2 (9.2)                           | 65.4 (10.0)                          | 65.6 (10.5)                    |
| Male                   | 76 (56.7)                  | 130 (57.3)                           | 72 (55.0)                            | 78 (45.9)                      |
| BMI, kg/m <sup>2</sup> | 28.6 (5.6)                 | 28.3 (5.3)                           | 28.3 (5.2)                           | 28.0 (5.2)                     |
| FVC % predicted        | 69.5 (16.0)                | 68.8 (15.7)                          | 69.3 (15.8)                          | 68.7 (15.3)                    |
| DLco % predicted       | 47.4 (12.8)                | 46.6 (14.6)                          | 46.6 (14.0)                          | 44.0 (12.6)                    |

Data are mean (SD) or n (%) of patients. *BMI*, body mass index, *DLco* diffusing capacity of the lung for carbon monoxide, *FVC* forced vital capacity, *ILD* interstitial lung disease.

**Table S6.** Baseline characteristics of subgroups by FVC % predicted in the INBUILD trial.

|                        | <b>FVC ≤50%<br/>predicted<br/>(n=75)</b> | <b>FVC<br/>&gt;50% to ≤70%<br/>predicted<br/>(n=314)</b> | <b>FVC<br/>&gt;70% to ≤90%<br/>predicted<br/>(n=209)</b> | <b>FVC &gt;90%<br/>predicted<br/>(n=65)</b> |
|------------------------|------------------------------------------|----------------------------------------------------------|----------------------------------------------------------|---------------------------------------------|
| Age, years             | 63.5 (9.9)                               | 65.4 (9.7)                                               | 66.2 (9.7)                                               | 68.6 (9.3)                                  |
| Male                   | 44 (58.7)                                | 161 (51.3)                                               | 109 (52.2)                                               | 42 (64.6)                                   |
| BMI, kg/m <sup>2</sup> | 27.6 (5.2)                               | 28.7 (5.6)                                               | 27.9 (5.2)                                               | 28.0 (4.1)                                  |
| FVC % predicted        | 47.4 (1.8)                               | 61.1 (5.6)                                               | 78.9 (5.4)                                               | 100.3 (9.8)                                 |
| DLco % predicted       | 37.5 (6.9)                               | 44.1 (13.9)                                              | 49.4 (12.8)                                              | 55.6 (12.9)                                 |

Data are mean (SD) or n (%) of patients. *BMI*, body mass index, *DLco* diffusing capacity of the lung for carbon monoxide, *FVC* forced vital capacity.

**Table S7.** Baseline characteristics in subgroups by DLco % predicted in the INBUILD trial.

|                        | <b>DLco ≤median</b> | <b>DLco &gt;median</b> |
|------------------------|---------------------|------------------------|
|                        | <b>(n=327)</b>      | <b>(n=327)</b>         |
| Age, years             | 66.6 (9.9)          | 65.0 (9.6)             |
| Male                   | 182 (55.7)          | 171 (52.3)             |
| BMI, kg/m <sup>2</sup> | 27.8 (5.3)          | 28.8 (5.3)             |
| FVC % predicted        | 63.5 (12.9)         | 74.3 (16.0)            |
| DLco % predicted       | 35.9 (4.6)          | 56.3 (12.0)            |

Data are mean (SD) or n (%) of patients. Median DLco at baseline was 43.3% predicted. *BMI*, body mass index, *DLco* diffusing capacity of the lung for carbon monoxide, *FVC* forced vital capacity.



**Table S8.** Baseline characteristics of subgroups by CPI in the INBUILD trial.

|                        | <b>CPI ≤45 (n=202)</b> | <b>CPI &gt;45 (n=452)</b> |
|------------------------|------------------------|---------------------------|
| Age, years             | 64.7 (10.0)            | 66.3 (9.6)                |
| Male                   | 103 (51.0)             | 250 (55.3)                |
| BMI, kg/m <sup>2</sup> | 28.7 (5.3)             | 28.1 (5.3)                |
| FVC % predicted        | 81.0 (15.6)            | 63.5 (12.1)               |
| DLco % predicted       | 61.5 (12.4)            | 39.2 (6.8)                |

Data are mean (SD) or n (%) of patients. *BMI*, body mass index, *CPI* composite physiologic index, *DLco* diffusing capacity of the lung for carbon monoxide, *FVC* forced vital capacity.

**Table S9.** Baseline characteristics of subgroups by GAP stage in the INBUILD trial.

|                        | <b>GAP stage I</b> | <b>GAP stage II or III</b> |
|------------------------|--------------------|----------------------------|
|                        | <b>(n=294)</b>     | <b>(n=369)</b>             |
| Age, years             | 60.6 (9.5)         | 69.8 (7.8)                 |
| Male                   | 99 (33.7)          | 257 (69.6)                 |
| BMI, kg/m <sup>2</sup> | 28.8 (5.5)         | 27.9 (5.1)                 |
| FVC % predicted        | 74.5 (15.8)        | 64.6 (14.0)                |
| DLco % predicted       | 53.6 (14.3)        | 40.3 (9.8)                 |

Data are mean (SD) or n (%) of patients. *BMI*, body mass index, *DLco* diffusing capacity of the lung for carbon monoxide, *FVC* forced vital capacity.

**Table S10.** Baseline characteristics of subgroups by use of anti-acid therapy in the INBUILD trial.

|                        | <b>Taking anti-acid therapy<br/>(n=380)</b> | <b>Not taking anti-acid<br/>therapy (n=283)</b> |
|------------------------|---------------------------------------------|-------------------------------------------------|
| Age, years             | 66.2 (9.5)                                  | 65.1 (10.1)                                     |
| Male                   | 212 (55.8)                                  | 144 (50.9)                                      |
| BMI, kg/m <sup>2</sup> | 28.5 (5.5)                                  | 27.9 (4.9)                                      |
| FVC % predicted        | 67.4 (14.7)                                 | 71.1 (16.6)                                     |
| DLco % predicted       | 44.5 (13.1)                                 | 48.3 (14.0)                                     |

Data are mean (SD) or n (%) of patients. Anti-acid therapies were defined based on the WHO Drug Dictionary (version 19.MAR) (Anatomical Therapeutic Chemical codes for ‘antacids’ and ‘drugs for peptic ulcer and gastro-oesophageal reflux disease [GORD]’ and preferred name ‘drugs for acid related disorders’). *BMI*, body mass index, *DLco* diffusing capacity of the lung for carbon monoxide, *FVC* forced vital capacity.

**Table S11.** Baseline characteristics of subgroups by use of DMARDs in the INBUILD trial.

|                        | <b>Taking DMARDs (n=91)</b> | <b>Not taking DMARDs<br/>(n=572)</b> |
|------------------------|-----------------------------|--------------------------------------|
| Age, years             | 65.6 (10.7)                 | 65.8 (9.6)                           |
| Male                   | 52 (57.1)                   | 304 (53.1)                           |
| BMI, kg/m <sup>2</sup> | 28.0 (4.8)                  | 28.3 (5.4)                           |
| FVC % predicted        | 72.1 (16.1)                 | 68.5 (15.5)                          |
| DLco % predicted       | 47.7 (14.2)                 | 45.9 (13.5)                          |

Data are mean (SD) or n (%) of patients. DMARDs were defined based on the WHO Drug Dictionary (version 19.MAR) standardised drug grouping excluding denosumab, plus baricitinib. *BMI*, body mass index, *DMARDs* disease-modifying anti-rheumatic drugs, *DLco* diffusing capacity of the lung for carbon monoxide, *FVC* forced vital capacity.

**Table S12.** Rate of decline in FVC (mL/year) over 52 weeks of the INBUILD trial in subgroups by baseline characteristics.

| Baseline characteristic | Nintedanib    |                                                              | Placebo       |                                                              | Difference<br>(95% CI) | Treatment-by-<br>subgroup-by-<br>time interaction |
|-------------------------|---------------|--------------------------------------------------------------|---------------|--------------------------------------------------------------|------------------------|---------------------------------------------------|
|                         | n<br>analysed | Rate (SE) of<br>decline in FVC<br>(mL/year) over<br>52 weeks | n<br>analysed | Rate (SE) of<br>decline in FVC<br>(mL/year) over<br>52 weeks |                        |                                                   |
| Sex                     |               |                                                              |               |                                                              |                        | <i>p</i> = 0.06                                   |
| Male                    | 179           | -88.9 (21.6)                                                 | 177           | -234.1 (21.6)                                                | 145.2 (88.5, 201.9)    |                                                   |
| Female                  | 153           | -72.6 (23.2)                                                 | 154           | -136.8 (22.8)                                                | 64.2 (3.9, 124.6)      |                                                   |
| Age                     |               |                                                              |               |                                                              |                        | <i>p</i> = 0.51                                   |
| <65 years               | 139           | -58.9 (22.8)                                                 | 121           | -145.8 (24.3)                                                | 86.9 (21.5, 152.2)     |                                                   |
| ≥65 years               | 193           | -97.5 (20.0)                                                 | 210           | -212.6 (18.7)                                                | 115.1 (61.4, 168.8)    |                                                   |
| Race*                   |               |                                                              |               |                                                              |                        | <i>p</i> = 0.77                                   |
| White                   | 242           | -69.9 (17.8)                                                 | 246           | -180.5 (17.2)                                                | 110.6 (62.0, 159.2)    |                                                   |
| Asian                   | 84            | -115.5 (29.6)                                                | 80            | -208.5 (30.7)                                                | 93.0 (9.3, 176.7)      |                                                   |
| Body mass index         |               |                                                              |               |                                                              |                        | <i>p</i> = 0.83                                   |
| <25 kg/m <sup>2</sup>   | 90            | -123.4 (28.5)                                                | 98            | -229.5 (27.5)                                                | 106.1 (28.3, 184.0)    |                                                   |

|                               |     |               |     |               |                     |                 |
|-------------------------------|-----|---------------|-----|---------------|---------------------|-----------------|
| ≥25 to <30 kg/m <sup>2</sup>  | 130 | -83.3 (24.2)  | 112 | -176.9 (25.5) | 93.7 (24.7, 162.6)  |                 |
| ≥30 kg/m <sup>2</sup>         | 111 | -46.9 (25.7)  | 121 | -171.2 (24.0) | 124.3 (55.4, 193.3) |                 |
| Time since diagnosis of ILD   |     |               |     |               |                     | <i>p</i> = 0.89 |
| ≤1 year                       | 67  | -62.2 (34.0)  | 67  | -163.8 (33.7) | 101.6 (7.5, 195.6)  |                 |
| >1 to ≤3 years                | 115 | -91.7 (25.6)  | 112 | -179.5 (25.3) | 87.8 (17.0, 158.5)  |                 |
| >3 to ≤5 years                | 74  | -89.0 (32.0)  | 57  | -206.7 (35.9) | 117.7 (23.2, 212.1) |                 |
| >5 years                      | 75  | -74.1 (32.1)  | 95  | -203.5 (28.0) | 129.4 (45.6, 213.1) |                 |
| FVC % predicted               |     |               |     |               |                     | <i>p</i> = 0.38 |
| ≤50                           | 42  | -178.2 (43.2) | 33  | -276.5 (51.1) | 98.3 (-28.9, 225.5) |                 |
| >50 to ≤70                    | 154 | -95.3 (22.5)  | 160 | -196.5 (21.5) | 101.3 (41.7, 160.9) |                 |
| >70 to ≤90                    | 104 | -29.2 (27.0)  | 105 | -127.8 (26.4) | 98.6 (26.1, 171.1)  |                 |
| >90                           | 32  | -51.7 (51.4)  | 33  | -272.4 (48.6) | 220.8 (92.7, 348.8) |                 |
| DLco % predicted <sup>†</sup> |     |               |     |               |                     | <i>p</i> = 0.40 |
| ≤median (43.3)                | 177 | -105.7 (21.1) | 150 | -198.1 (22.5) | 92.4 (32.3, 152.5)  |                 |
| >median (43.3)                | 149 | -57.1 (22.3)  | 178 | -185.6 (20.0) | 128.4 (70.1, 186.8) |                 |
| CPI                           |     |               |     |               |                     | <i>p</i> = 0.48 |
| ≤45                           | 82  | -12.9 (31.1)  | 120 | -151.3 (24.6) | 138.4 (62.7, 214.1) |                 |

|                                       |     |               |     |               |                     |            |
|---------------------------------------|-----|---------------|-----|---------------|---------------------|------------|
| >45                                   | 244 | -106.2 (17.7) | 208 | -212.0 (19.1) | 105.9 (55.2, 156.5) |            |
| GAP stage                             |     |               |     |               |                     | $p = 0.60$ |
| I                                     | 142 | -43.6 (22.4)  | 152 | -141.5 (21.2) | 98.0 (37.6, 158.3)  |            |
| II or III                             | 190 | -110.7 (20.2) | 179 | -230.5 (20.5) | 119.8 (63.4, 176.2) |            |
| Taking anti-acid therapy <sup>‡</sup> |     |               |     |               |                     | $p = 0.66$ |
| Yes                                   | 200 | -70.1 (19.5)  | 180 | -184.0 (20.2) | 113.9 (58.8, 169.0) |            |
| No                                    | 132 | -97.1 (23.9)  | 151 | -192.3 (21.9) | 95.2 (31.5, 158.9)  |            |
| DMARDs <sup>§</sup>                   |     |               |     |               |                     | $p = 0.44$ |
| Yes                                   | 43  | -82.2 (44.2)  | 48  | -230.6 (38.1) | 148.4 (33.9, 262.9) |            |
| No                                    | 289 | -80.6 (16.0)  | 283 | -180.1 (16.1) | 99.5 (54.8, 144.2)  |            |

*CPI* composite physiologic index, *DLco* diffusing capacity of the lung for carbon monoxide, *DMARDs* disease-modifying anti-rheumatic drugs, *FVC* forced vital capacity, *GAP* gender, age, lung physiology, *ILD* interstitial lung disease. \*Data on Black patients are not shown as the number of patients in this subgroup (n=10) was too small for the data to be interpreted. †Corrected for haemoglobin. ‡Based on WHO Drug Dictionary (version 19.MAR) (Anatomical Therapeutic Chemical codes for ‘antacids’ and ‘drugs for peptic ulcer and gastro-oesophageal reflux disease [GORD]’ and preferred name ‘drugs for acid related disorders’). §Based on WHO Drug Dictionary (version 19.MAR) standardised drug grouping excluding denosumab, plus baricitinib.
